# Supplementary material for: Direct Feeding at the Breast Is Associated with Breast Milk Feeding Duration among Preterm Infants
Source: MDPI journal article supplement (doi:10.3390/nu9111202), 2017-11-01
Supplement: s1 [file s1]

**Data collection questionnaire on breastmilk feeding among mothers who gave birth to preterm infants (born before 32 weeks of GA) during 2012-2015**

Questionnaire for participating mothers

Mother's first and last name \_\_\_\_\_

Child's name \_\_\_\_\_

Child's date of birth \_\_\_\_\_

Date of completing the questionnaire \_\_\_\_\_

- Was the pregnancy a twin pregnancy? Yes / No
- If the answer is yes, was this baby the first or the second twin? 1<sup>st</sup> / 2<sup>nd</sup>
- Was your baby fed by breastmilk (in any way: directly at the breast, pumped breastmilk)?  
Yes/No

If your baby was fed breastmilk:

- How long was your baby fed **exclusively** by breastmilk (**exclusively** = without any additional infant formula, breast milk only)? \_\_\_\_\_
- How long was your baby fed by breastmilk (even combined with formula)?  
\_\_\_\_\_
- How did your baby receive the breastmilk (directly at the breast only (nursing) /pumped breastmilk only/both)?
- Why did you discontinue feeding your baby breastmilk? (e.g., end of maternity leave and need to go back to work/ inadequate supply of milk / personal preference / other)  
\_\_\_\_\_

If your baby was **not** fed breastmilk:

- What was the reason for not feeding your baby with breastmilk?  
\_\_\_\_\_
- During your pregnancy, before you gave birth prematurely, did you intend to breastfeed your baby? Yes/No
- Did you nurse (directly breastfeed) previous children? Yes/No
- Did you pump breastmilk with previous children? Yes/No
- If so, what problems did you encounter? \_\_\_\_\_  
What helped you? \_\_\_\_\_

Thank you for completing the questionnaire.

If you have any further questions please feel free to ask Dr. IM, Dr. LL, or Dr. SP
